# Supplementary material for: Extraction, purification and anticancer activity studies on triterpenes from pomegranate peel
Source: Royal Society of Chemistry journal article supplement (doi:10.1039/d4fo00183d), 2024-01-01
Supplement: d4fo00183d1.pdf [file d4fo00183d1.pdf]

## Supplementary data

### Extraction, purification and anticancer activity studies on triterpenes in pomegranate peel

Mengqi Zhang<sup>a, b, †</sup>, Yutao Zhang<sup>a, c, †</sup>, Xu Guo<sup>a</sup>, Yingying Chen<sup>a</sup>, Huimin Li<sup>d</sup>, Guihua Zhou<sup>d</sup>, Shutao Sun<sup>a</sup>,  
Qidong Ren<sup>a</sup>, Jesus Simal-Gandara<sup>e</sup>, Jinyue Sun<sup>a, \*</sup>, Ningyang Li<sup>c, f, \*</sup>, Chao Liu<sup>a, \*</sup>

<sup>a</sup> Key Laboratory of Novel Food Resources Processing, Ministry of Agriculture and Rural Affairs/Key Laboratory of Agro-Products Processing Technology of Shandong Province, Institute of Agro-Food Science and Technology, Shandong Academy of Agricultural Sciences, 23788 Gongye North Road, Jinan, 250100, PR China;

<sup>b</sup> Shandong Huatai Industrial Technology Institute of Nutrition and Health Co, LTD, 9 Hongji Road, Jinan, 251400, PR China;

<sup>c</sup> Key Laboratory of Food Processing Technology and Quality Control in Shandong Province, College of Food Science and Engineering, Shandong Agricultural University, Tai'an, 271017, PR China;

<sup>d</sup> Development Center of melon, fruit and vegetable industry in Kashi, Kashi, 844000, PR China;

<sup>e</sup> Universidade de Vigo, Nutrition and Bromatology Group, Department of Analytical Chemistry and Food Science, Faculty of Science, E32004 Ourense, Spain;

<sup>f</sup> College of Food Science and Engineering, Ocean University of China, Qingdao, 266003, PR China

<sup>†</sup> These authors contributed equally to this work.

\*Corresponding authors:

Tel: +86 0531 66659825; Fax: 86-531-66659825;

E-mail addresses: liuchao555@126.com (C. Liu), ningyangli@126.com (N. Li),  
moon\_s731@hotmail.com (J. Sun).

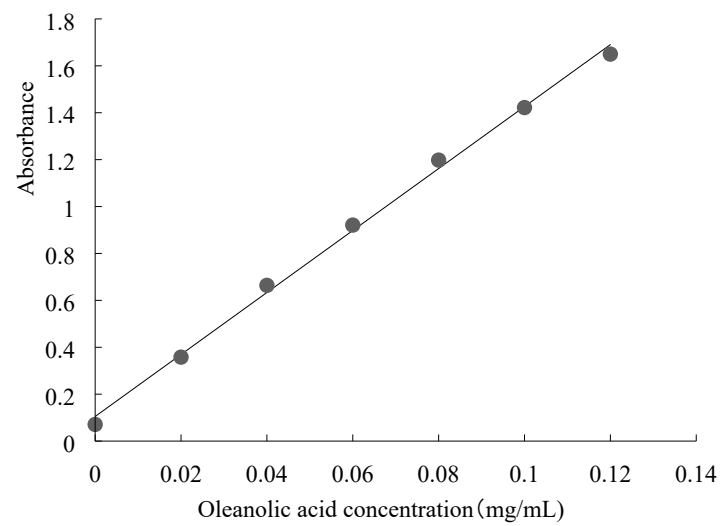

**Figure S1.** Standard curve of triterpene.

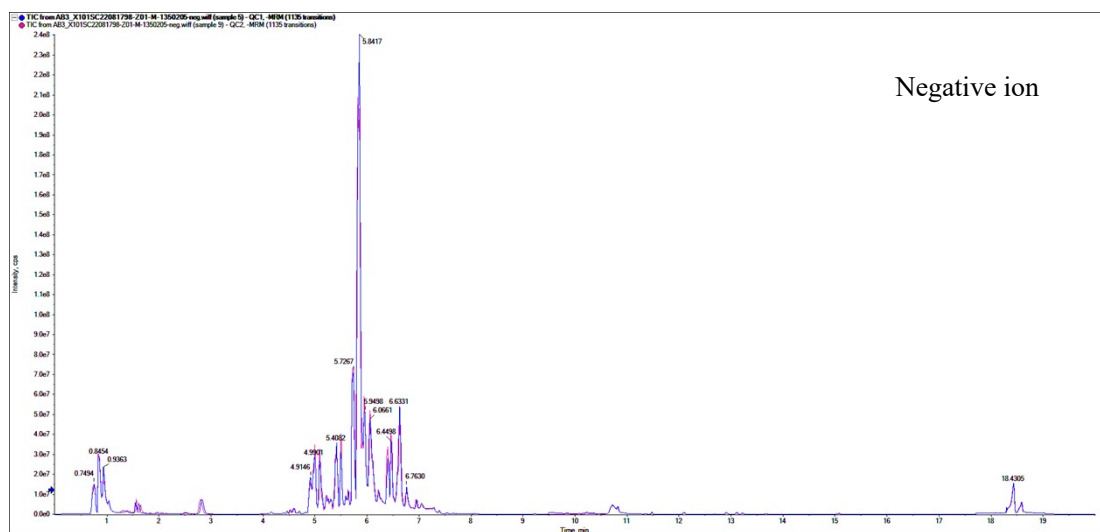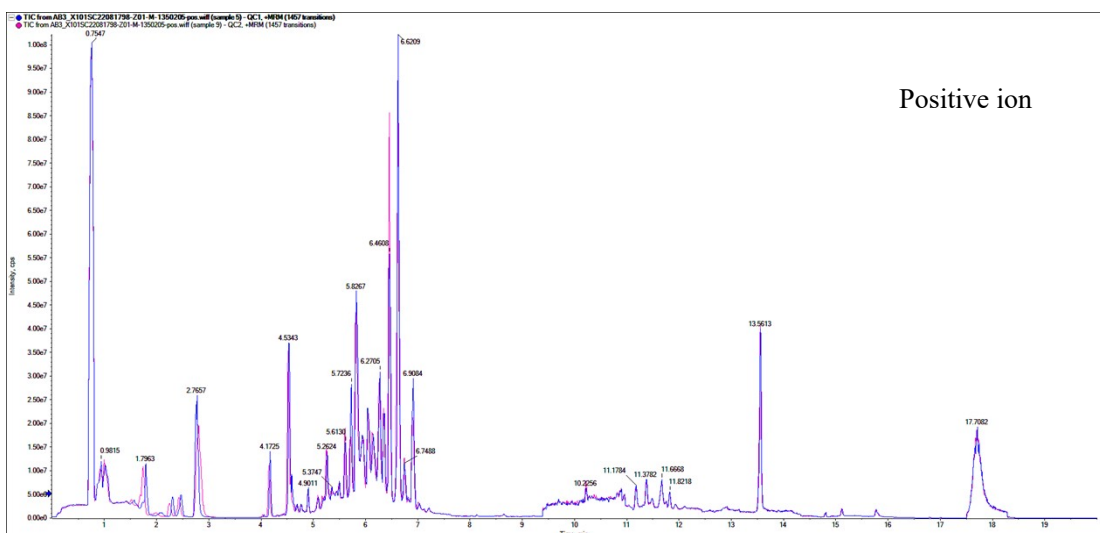

Figure S2. The total ion chromatography of TPP.

### AKT1

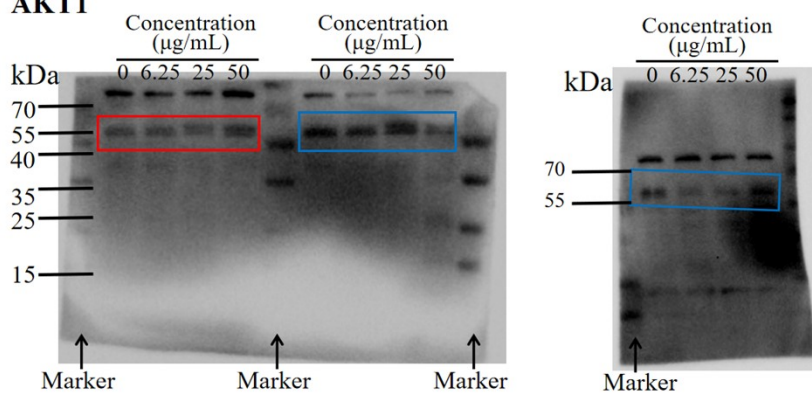

### Caspase-3

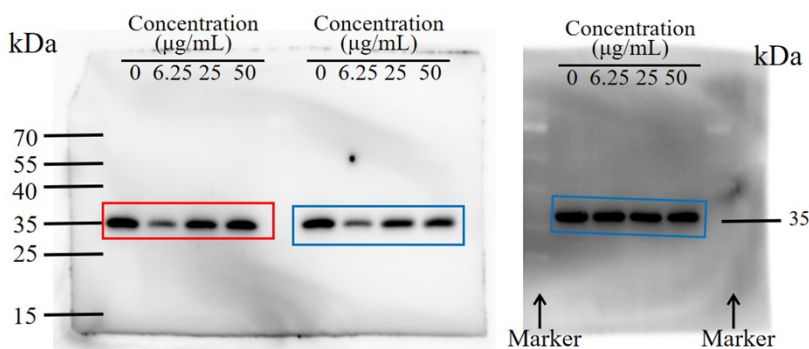

### SRC

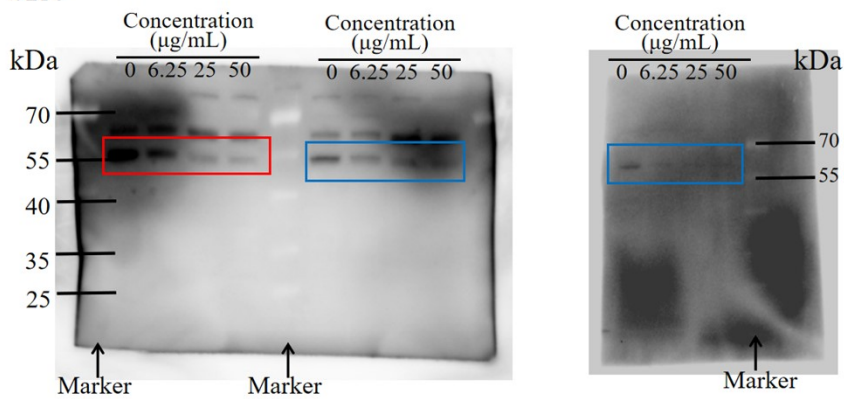

### GRB2

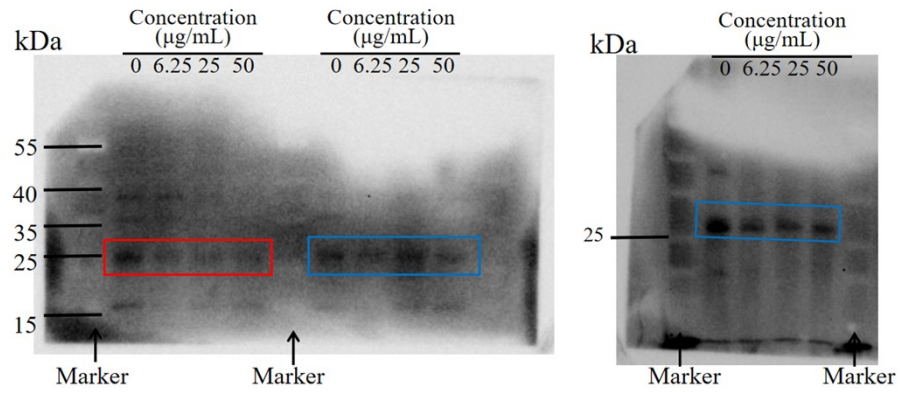

### EGFR

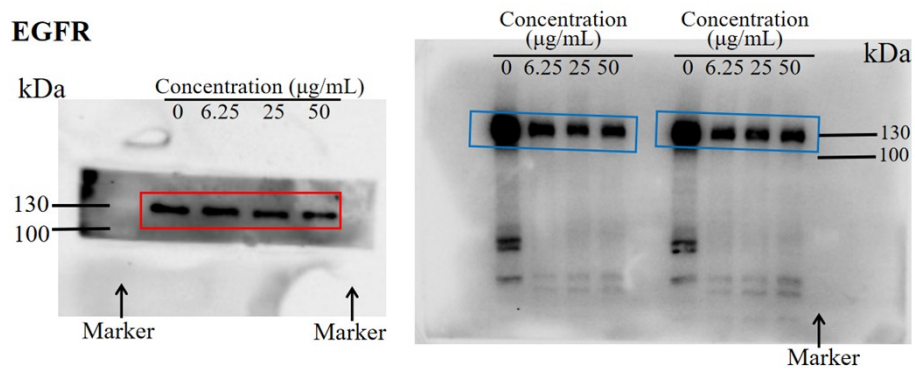

### GAPDH

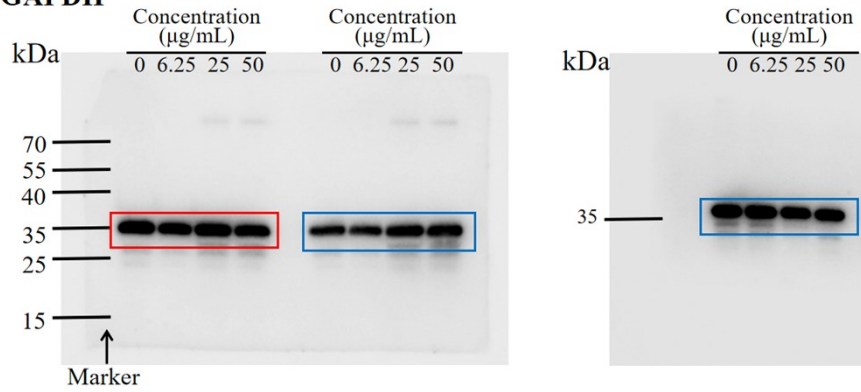

### Bax

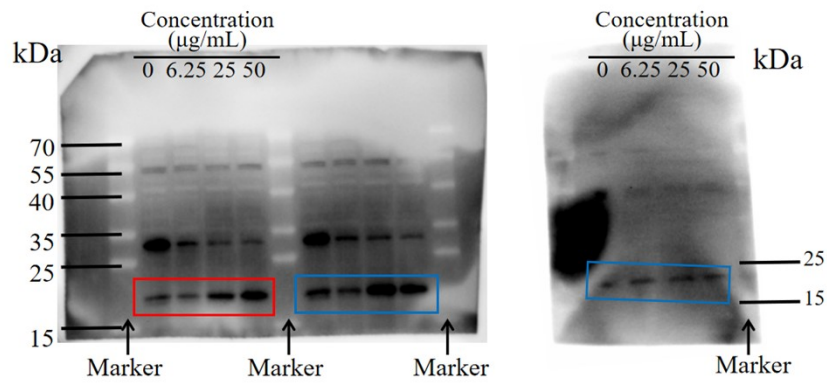

### Bcl-2

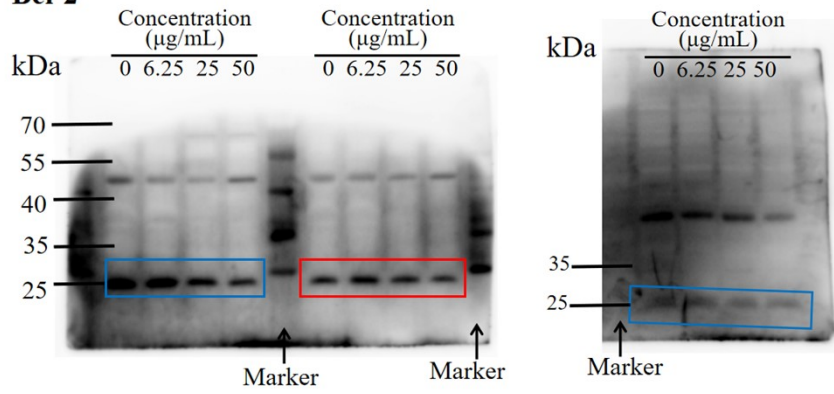

### Cytochrome C

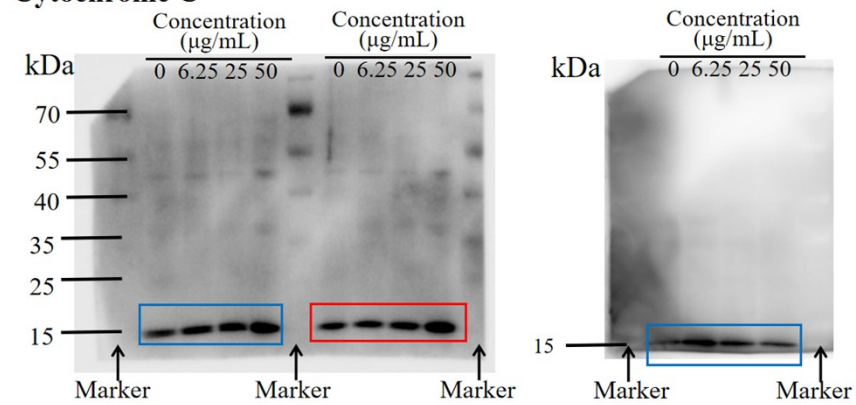

### Cleaved cas-3

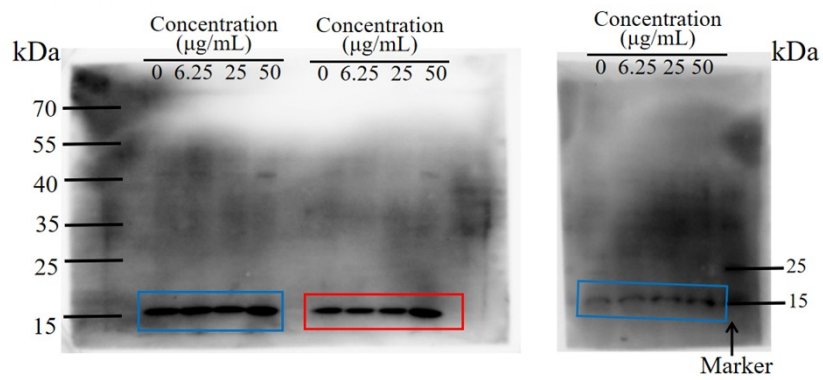

### Cleaved cas-9

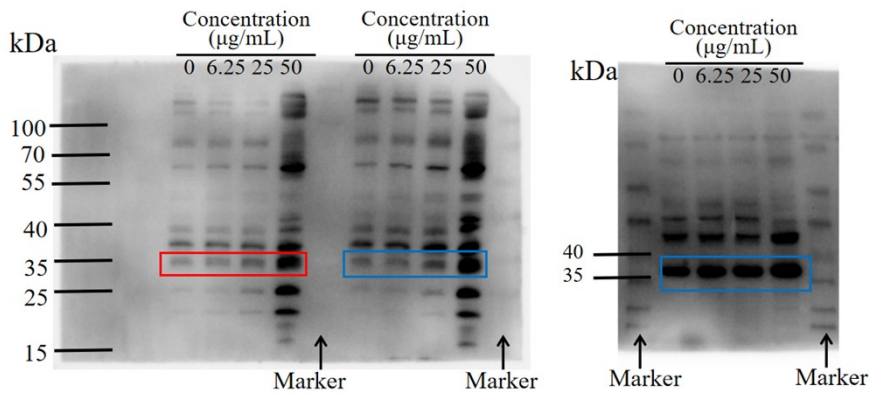

### GAPDH

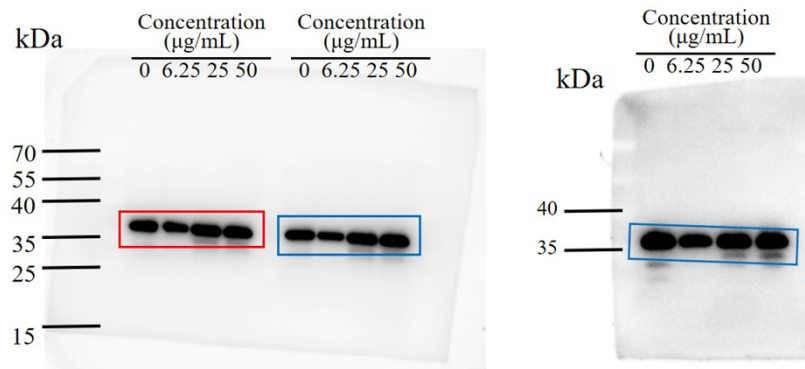

**Figure S3.** The image of the uncropped and unprocessed Western blot labelled with closest molecular mass markers. Note: The target proteins were labelled with the red box, which were shown in the manuscript. And the bands labelled with blue boxes were the replicate experiments. Some of the raw images contained multiple bands, which may be caused by poor specificity of primary antibody. Therefore, the corresponding bands of the target proteins were determined by the molecular weight compared with the Marker.

**Table S1.** Level table of Box-Behnken test factors.

| Factor                      | Level |      |      |
|-----------------------------|-------|------|------|
|                             | -1    | 0    | 1    |
| Ethanol Concentration (%)   | 70    | 80   | 90   |
| Solid-liquid Ratio (g/mL)   | 1:20  | 1:30 | 1:40 |
| Ultrasonic Power (W)        | 100   | 200  | 300  |
| Ultrasonic Temperature (°C) | 50    | 60   | 70   |



**Table S2.** The liquid-phase separation gradient conditions of TPP.

| Gradient |          |       |        |
|----------|----------|-------|--------|
| 1        | 0 min    | 98% A | 2% B   |
| 2        | 2 min    | 98% A | 2% B   |
| 3        | 15 min   | 0% A  | 100% B |
| 4        | 17 min   | 0% A  | 100% B |
| 5        | 17.1 min | 98% A | 2% B   |
| 6        | 20 min   | 98% A | 2% B   |

**Table S3.** Experimental scheme and results of triterpenes extracted from pomegranate peel.

|    | Ethanol Concentration (%) | Solid-liquid Ratio (g/mL) | Ultrasonic Power (W) | Ultrasonic temperature (°C) | Triterpene Content (µg/mg) |
|----|---------------------------|---------------------------|----------------------|-----------------------------|----------------------------|
| 1  | 70                        | 1:20                      | 200                  | 60                          | 206.38                     |
| 2  | 90                        | 1:20                      | 200                  | 60                          | 224.35                     |
| 3  | 70                        | 1:40                      | 200                  | 60                          | 205.21                     |
| 4  | 90                        | 1:40                      | 200                  | 60                          | 234.25                     |
| 5  | 80                        | 1:30                      | 100                  | 50                          | 220.39                     |
| 6  | 80                        | 1:30                      | 300                  | 50                          | 221.3                      |
| 7  | 80                        | 1:30                      | 100                  | 70                          | 251.91                     |
| 8  | 80                        | 1:30                      | 300                  | 70                          | 229.68                     |
| 9  | 70                        | 1:30                      | 200                  | 50                          | 188.94                     |
| 10 | 90                        | 1:30                      | 200                  | 50                          | 190.24                     |
| 11 | 70                        | 1:30                      | 200                  | 70                          | 169.39                     |
| 12 | 90                        | 1:30                      | 200                  | 70                          | 228.6                      |
| 13 | 80                        | 1:20                      | 100                  | 60                          | 246.95                     |
| 14 | 80                        | 1:40                      | 100                  | 60                          | 237.84                     |
| 15 | 80                        | 1:20                      | 300                  | 60                          | 226.19                     |
| 16 | 80                        | 1:40                      | 300                  | 60                          | 227.95                     |
| 17 | 70                        | 1:30                      | 100                  | 60                          | 174.58                     |
| 18 | 90                        | 1:30                      | 100                  | 60                          | 225.94                     |
| 19 | 70                        | 1:30                      | 300                  | 60                          | 201.35                     |
| 20 | 90                        | 1:30                      | 300                  | 60                          | 207.56                     |
| 21 | 80                        | 1:20                      | 200                  | 50                          | 216.5                      |
| 22 | 80                        | 1:40                      | 200                  | 50                          | 186.35                     |
| 23 | 80                        | 1:20                      | 200                  | 70                          | 248.51                     |
| 24 | 80                        | 1:40                      | 200                  | 70                          | 233.21                     |
| 25 | 80                        | 1:30                      | 200                  | 60                          | 281.48                     |
| 26 | 80                        | 1:30                      | 200                  | 60                          | 280.95                     |
| 27 | 80                        | 1:30                      | 200                  | 60                          | 269.73                     |
| 28 | 80                        | 1:30                      | 200                  | 60                          | 251.01                     |
| 29 | 80                        | 1:30                      | 200                  | 60                          | 275.48                     |

**Table S4.** Results of variance analysis of quadratic regression equation model of response surface.

| Source                      | Sum of Squares | df | Mean Square | F Value | p-value Prob > F |                 |
|-----------------------------|----------------|----|-------------|---------|------------------|-----------------|
| Model                       | 22573.14       | 14 | 1612.37     | 9.43    | < 0.0001         | significant     |
| A-Ethanol Concentration (%) | 2271.23        | 1  | 2271.23     | 13.28   | 0.0027           |                 |
| B-Solid-liquid Ratio (g/mL) | 161.85         | 1  | 161.85      | 0.95    | 0.3471           |                 |
| C-Ultrasonic Power (W)      | 158.27         | 1  | 158.27      | 0.93    | 0.3523           |                 |
| D-Ultrasonic Power (°C)     | 1577.35        | 1  | 1577.35     | 9.22    | 0.0089           |                 |
| AB                          | 30.64          | 1  | 30.64       | 0.18    | 0.6785           |                 |
| AC                          | 509.63         | 1  | 509.63      | 2.98    | 0.1063           |                 |
| AD                          | 838.39         | 1  | 838.39      | 4.9     | 0.0439           |                 |
| BC                          | 29.54          | 1  | 29.54       | 0.17    | 0.684            |                 |
| BD                          | 55.13          | 1  | 55.13       | 0.32    | 0.5792           |                 |
| CD                          | 133.86         | 1  | 133.86      | 0.78    | 0.3912           |                 |
| A <sup>2</sup>              | 13476.9        | 1  | 13476.9     | 78.82   | < 0.0001         |                 |
| B <sup>2</sup>              | 1654.15        | 1  | 1654.15     | 9.67    | 0.0077           |                 |
| C <sup>2</sup>              | 2274.43        | 1  | 2274.43     | 13.3    | 0.0026           |                 |
| D <sup>2</sup>              | 5665.13        | 1  | 5665.13     | 33.13   | < 0.0001         |                 |
| Residual                    | 2393.87        | 14 | 170.99      |         |                  |                 |
| Lack of Fit                 | 1766.41        | 10 | 176.64      | 1.13    | 0.4946           | Not significant |
| Pure Error                  | 627.45         | 4  | 156.86      |         |                  |                 |
| Cor Total                   | 24967.01       | 28 |             |         |                  |                 |

**Table S5.** The information of identified triterpene compounds.

| No. | Name                 | Formula                                         | Molecular Weight | RT [min] | CAS        | Peak area |
|-----|----------------------|-------------------------------------------------|------------------|----------|------------|-----------|
| 1   | Corosolic acid       | C <sub>30</sub> H <sub>48</sub> O <sub>4</sub>  | 472.7            | 13.22    | 4547-24-4  | 457400    |
| 2   | Ursolic Acid         | C <sub>30</sub> H <sub>48</sub> O <sub>3</sub>  | 456.7            | 15.069   | 77-52-1    | 8560      |
| 3   | Betulonic acid       | C <sub>30</sub> H <sub>48</sub> O <sub>3</sub>  | 456.7            | 14.842   | 472-15-1   | 63030     |
| 4   | Oleanic acid         | C <sub>30</sub> H <sub>48</sub> O <sub>3</sub>  | 456.71           | 15.03    | 508-02-1   | 4820      |
| 5   | Ginsenoside-Ro       | C <sub>48</sub> H <sub>76</sub> O <sub>19</sub> | 957.119          | 8.86     | 34367-04-9 | 984       |
| 6   | Maslinic acid        | C <sub>30</sub> H <sub>48</sub> O <sub>4</sub>  | 472.7            | 13.077   | 4373-41-5  | 656500    |
| 7   | Asiatic Acid         | C <sub>30</sub> H <sub>48</sub> O <sub>5</sub>  | 488.7            | 10.75    | 464-92-6   | 3644000   |
| 8   | Dipsacoside B        | C <sub>53</sub> H <sub>86</sub> O <sub>22</sub> | 1075.238         | 6.756    | 33289-85-9 | 34780     |
| 9   | Isomangiferolic acid | C <sub>30</sub> H <sub>48</sub> O <sub>3</sub>  | 456.36           | 14.72    | 13878-92-7 | 50130     |
| 10  | Betulonic acid       | C <sub>30</sub> H <sub>46</sub> O <sub>3</sub>  | 454.68           | 11.061   | 4481-62-3  | 67210     |
| 11  | Cucurbitacin I       | C <sub>30</sub> H <sub>42</sub> O <sub>7</sub>  | 514.293          | 0.67     | 2222-07-3  | 16500     |
| 12  | Kaji-ichigoside F1   | C <sub>36</sub> H <sub>58</sub> O <sub>10</sub> | 650.85           | 6.71     | 95298-47-8 | 162337    |
